# Supplementary material for: Visual associative learning in wood ants
Source: Oxford University Press journal article supplement (doi:10.1242/jeb.173260), 2017-01-01
Supplement: jeb173260supp.pdf [file jeb173260supp.pdf]

## SUPPLEMENTARY INFORMATION

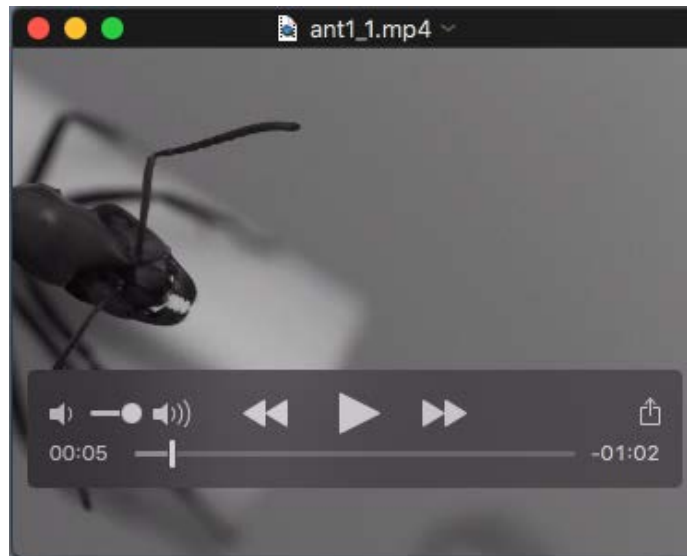

**Movie 1.** Response to the CS from one ant during paired training, showing the three types of MaLER.

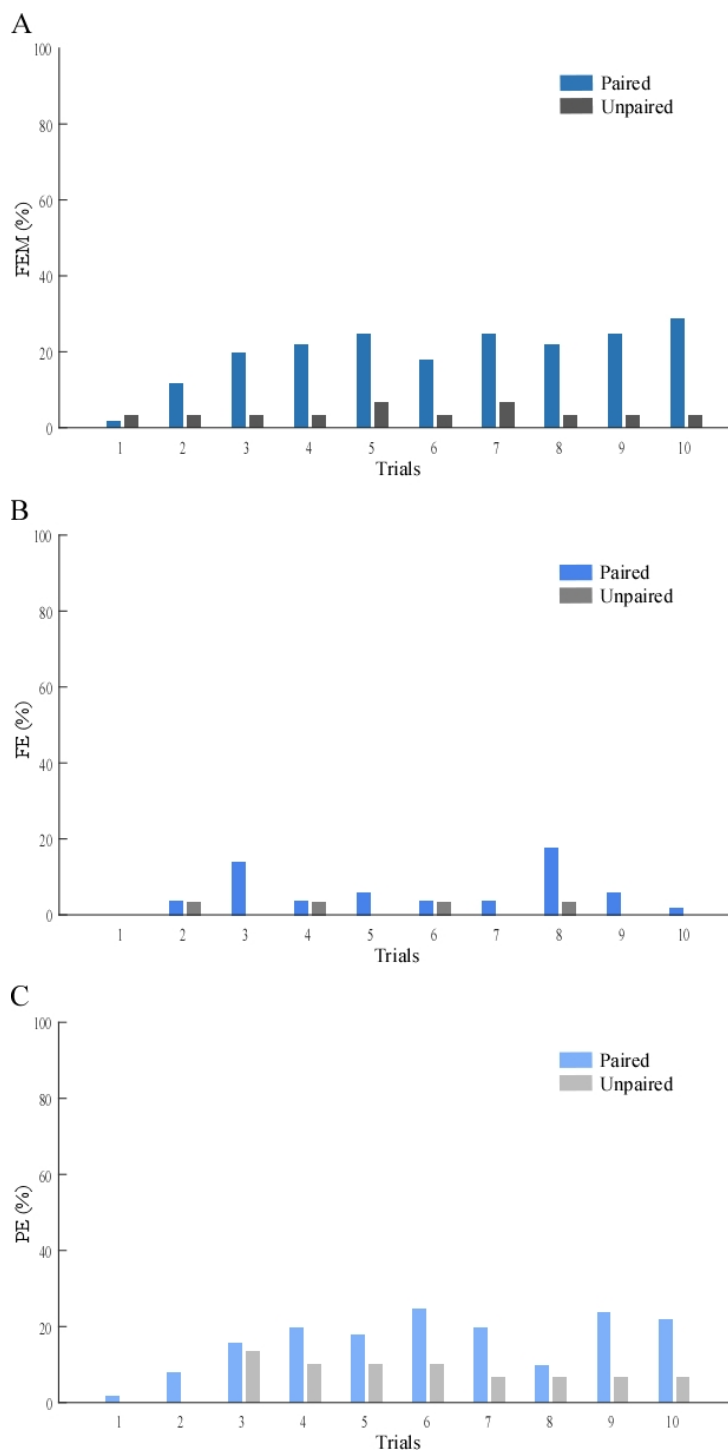

**Fig. S1. Learning curves based on each type of MaLER.** A) The percentage of paired ants (N=51) performing FEM in response to the CS presentation increased throughout training, but not for unpaired ants (N=29). B) The percentage of ants (paired: N=51; unpaired: N=29) performing FE in response to the CS presentation didn't increase during training for both paired and unpaired ants. C) The percentage of paired ants (N=51) performing PE in response to the CS presentation increased throughout training, but not for unpaired ants (N=29).

| Type of training | Type of MaLER | N  | df | z     | p        |
|------------------|---------------|----|----|-------|----------|
| Paired           | FEM           | 51 | 50 | 3.868 | 0.0001** |
|                  | FE            | 51 | 50 | 0.835 | 0.404    |
|                  | PE            | 51 | 50 | 2.975 | 0.0029** |
| Unpaired         | FEM           | 29 | 28 | 0.129 | 0.8977   |
|                  | FE            | 29 | 28 | 0.349 | 0.7267   |
|                  | PE            | 29 | 28 | 0.839 | 0.402    |

**Table S1. Influence of training in ants' responses to the CS, for each type of MaLER.** The number of ants (N), degrees of freedom (df), Logistic regression (z) and p-value are shown.
